# Supplementary material
Source: publisher figshare collection journal article supplement (https://acs.figshare.com/ndownloader/files/18105380)
Supplement: Supplementary file 1 [file 18105380]

*Supplementary Information for:*  
**Application of Non-Target High Resolution Mass Spectrometry Data to Quantitative  
Source Apportionment**

Katherine T. Peter<sup>1,2\*</sup>, Christopher Wu<sup>1,2</sup>, Zhenyu Tian<sup>1,2</sup>, Edward P. Kolodziej<sup>1,2,3</sup>

<sup>1</sup> Interdisciplinary Arts and Science, University of Washington Tacoma, Tacoma WA, 98421  
USA

<sup>2</sup> Center for Urban Waters, Tacoma WA, 98421 USA

<sup>3</sup> Department of Civil and Environmental Engineering, University of Washington, Seattle WA,  
98195 USA

Revised October 10, 2019 for  
*Environmental Science & Technology*

10 pages, 7 tables, and 2 figures

\*Corresponding author contact information

Email: ktpeter@uw.edu

Mail: Center for Urban Waters

326 E. D Street, Tacoma, WA 98421

**Table S1.** Composition and relative concentration of roadway runoff sources and creek water in each of the nine mixtures representing the model watershed.

**Table S2.** Isotopically labeled internal standards.

**Table S3.** Profinder data extraction settings.

**Table S4.** Source concentration estimate results for various method iterations.

**Table S5.** Results of SR520 source concentration estimates in single-source mixtures for various iterations of the source dilution curve range. These data compare estimates using only compounds within the peak area range of the modified dilution curve to estimates made using all qualified compounds, regardless of whether the mixture peak area fell within the peak area range of the dilution curve. The numbers of non-target compounds falling within, above, and below the dilution curve peak area range are also provided.

**Table S6.** Median peak area response observed for 12 isotopically labeled internal standards in the SR520 sample dilution curve.

**Table S7.** Quantitative estimates for SR520 roadway runoff concentration (as % v/v) using source-specific chemical surrogates identified within the non-target data set. The identified surrogates met the SR520 sample dilution curve screening criteria, were detected in all single-source watershed mixtures, and were absent in the SR518 runoff.

**Figure S1.** Hierarchical cluster diagram of SR518 and SR520 road runoff.

**Figure S2.** SR520 sample dilution curves for identified compounds.

**Chemicals.** Hexa(methoxymethyl)melamine (HMMM; 95%, CAS 3089-11-0), 1,3-diphenylguanidine (DPG; 97%, CAS 102-06-7), N-methyl-dicyclohexylamine (97%, CAS 7560-83-0), 1-cyclohexyl-3-phenylurea (97%, CAS 886-59-9), N-cyclohexylbenzothiazolamine (95%, CAS 28291-75-0), cotinine ( $\geq 98\%$ , CAS 486-56-6), carbamazepine ( $\geq 99\%$ , CAS 298-46-4), prometryn (99%, CAS 7287-16-6), theobromine-d3 (98%, CAS 117490-40-1), and sulfadimethoxine-d6 ( $\geq 98\%$ , CAS 73068-02-7) were purchased from Sigma Aldrich (St. Louis, MO, USA). Nicotine-d3 ( $>98\%$ , CAS 69980-24-1), sulfamethoxazole-d4 ( $>98\%$ , CAS 1020719-86-1), atrazine-d5 ( $>98\%$ , CAS 163165-75-1), DEET-d7 ( $>98\%$ , CAS 1219799-37-7), prometon-d3 ( $>98\%$ , CAS 1219803-43-6), metolachlor-d6 ( $>98\%$ , CAS 1219803-97-0), and bis(2-ethylhexyl)phthalate-d4 ( $>98\%$ , CAS 93951-87-2) were purchased from CDN Isotopes (Pointe-Claire, Quebec, Canada). Cotinine-d3 ( $>98\%$ , CAS 110952-70-0) and carbamazepine-d10 ( $>99\%$ , CAS 132183-78-9) were purchased from Cerilliant (Round Rock, TX, USA). 5-methyl-1H-benzotriazole-d6 ( $>98\%$ , CAS 1246820-65-4) was purchased from Toronto Research Chemicals (North York, Ontario, Canada). Acetic acid ( $>99.7\%$ ) and ammonium acetate (HPLC grade, 97.8%) were purchased from VWR Scientific (Radnor, PA, USA). Methanol (MeOH: OPTIMA® grade) and Triton X-100 (octylphenol ethoxylate, scintillation grade; Research Products International) were obtained from Fisher Scientific (Fair Lawn, NJ, USA). A water purification system (Thermo Barnstead Nanopure Diamond UV, Dubuque, IA, USA) provided 18 M $\Omega$  water.

**Identifications.** Identification efforts relied on formula assignment in Agilent Qualitative Analysis (B.08) and comparison of MS/MS spectra to online databases (METLIN, mzCloud) and/or reference standards. If reference standards were available, retention times were also compared. Identification confidence was assigned according to criteria proposed by Schymanski *et al*, where level S1 indicates a reference standard match and level S2 indicates a match to MS/MS database (S2a) and/or expert assessment of MS/MS fragmentation patterns (S2b). Level S4 indicates confident assignment of the formula.<sup>1</sup>

**Table S1.** Composition and relative concentration of roadway runoff sources and creek water in each of the nine mixtures representing the model watershed.

| Mix | % SR520 | % Coulter Creek | % Kautz Creek | % Crescent Valley Creek #1 (Dec) | % Swan Creek #1 (Dec) | % SR518 | % Crescent Valley Creek #2 (May) | % Swan Creek #2 (May) |
|-----|---------|-----------------|---------------|----------------------------------|-----------------------|---------|----------------------------------|-----------------------|
| 1   | 30      | 70              | --            | --                               | --                    | --      | --                               | --                    |
| 2   | 18      | 42              | 40            | --                               | --                    | --      | --                               | --                    |
| 3   | 10      | 23              | 22            | 45                               | --                    | --      | --                               | --                    |
| 4A  | 4       | 9               | 9             | 18                               | 60                    | --      | --                               | --                    |
| 5A  | 1       | 2.3             | 2.2           | 4.5                              | 15                    | --      | 75                               | --                    |
| 6A  | 0.16    | 0.37            | 0.35          | 0.72                             | 2.4                   | --      | 12                               | 84                    |
| 4B  | 4       | 9               | 9             | 18                               | 50                    | 10      | --                               | --                    |
| 5B  | 1       | 2.3             | 2.2           | 4.5                              | 12.5                  | 2.5     | 75                               | --                    |
| 6B  | 0.16    | 0.37            | 0.35          | 0.72                             | 2                     | 0.4     | 12                               | 84                    |

**Table S2.** Isotopically labeled internal standards used for QA/QC of non-target HRMS data, intended to represent a range of physico-chemical properties (e.g., polarity, functional groups) and a corresponding range of retention times, ionization efficiencies, and analytical responses (to the extent possible).

| Compound                      | Formula                                                                       | Retention Time [min] | Concentration [ng/mL] |
|-------------------------------|-------------------------------------------------------------------------------|----------------------|-----------------------|
| Nicotine-d3                   | C <sub>10</sub> H <sub>11</sub> D <sub>3</sub> N <sub>2</sub>                 | 1.89                 | 500                   |
| Theobromine-d6                | C <sub>7</sub> H <sub>2</sub> D <sub>6</sub> N <sub>4</sub> O <sub>2</sub>    | 3                    | 200                   |
| Cotinine-d3                   | C <sub>10</sub> H <sub>9</sub> D <sub>3</sub> N <sub>2</sub> O                | 3.44                 | 100                   |
| Carbamazepine-d10             | C <sub>15</sub> H <sub>2</sub> D <sub>10</sub> N <sub>2</sub> O               | 6.4                  | 25                    |
| Sulfamethoxazole-d4           | C <sub>10</sub> H <sub>7</sub> D <sub>4</sub> N <sub>3</sub> O <sub>3</sub> S | 4.28                 | 100                   |
| Sulfadimethoxine-d6           | C <sub>12</sub> H <sub>8</sub> D <sub>6</sub> N <sub>4</sub> O <sub>4</sub> S | 5                    | 100                   |
| 5-methyl-1H-benzotriazole-d6  | C <sub>7</sub> HD <sub>6</sub> N <sub>3</sub>                                 | 5                    | 100                   |
| Atrazine-d5                   | C <sub>8</sub> H <sub>9</sub> D <sub>5</sub> ClN <sub>5</sub>                 | 5                    | 100                   |
| DEET-d7                       | C <sub>12</sub> H <sub>10</sub> D <sub>7</sub> NO                             | 7.19                 | 100                   |
| Prometon-d3                   | C <sub>10</sub> H <sub>16</sub> D <sub>3</sub> N <sub>5</sub> O               | 7.97                 | 100                   |
| Metolachlor-d6                | C <sub>15</sub> H <sub>16</sub> D <sub>6</sub> ClNO <sub>2</sub>              | 9.9                  | 100                   |
| Bis(2-ethylhexyl)phthalate-d4 | C <sub>24</sub> H <sub>34</sub> D <sub>4</sub> O <sub>4</sub>                 | 16.8                 | 100                   |

**Table S3.** Profinder data extraction settings.

| <b>Profinder Batch Recursive Feature Extraction Wizard Step</b> | <b>Category</b>                   | <b>Setting</b>                                                                                        |
|-----------------------------------------------------------------|-----------------------------------|-------------------------------------------------------------------------------------------------------|
| Molecular Feature Extraction (MFE) – Extraction Parameters      | Noise peak height                 | $\geq 300$ counts                                                                                     |
|                                                                 | Ion Species                       | +H, +Na, +NH <sub>4</sub> (salt-dominated positive ions)                                              |
|                                                                 | Isotope model                     | Common organic molecules                                                                              |
|                                                                 | Limit assigned charge states to   | 1-2                                                                                                   |
| MFE - Compound Filters                                          | Compound ion count threshold      | Two or more ions                                                                                      |
| Compound Binning and Alignment                                  | RT window                         | 0.6 min                                                                                               |
|                                                                 | Mass window                       | 30 ppm                                                                                                |
| MFE – Post-Processing Filters                                   | Absolute height                   | $\geq 5000$ counts                                                                                    |
|                                                                 | Score (MFE)                       | $\geq 70$                                                                                             |
|                                                                 | Satisfy MFE conditions in         | $\geq 2$ files                                                                                        |
| Find by Ion – Matching Tolerances and Scoring                   | EIC tolerance, possible m/z       | Symmetric, +/- 50 ppm                                                                                 |
|                                                                 | EIC tolerance, expected RT range  | +/- 1.5 min                                                                                           |
|                                                                 | Expected data variation           | MS mass 2.0 mDa + 10 ppm or 15%                                                                       |
|                                                                 | Scoring                           | Mass score (100), isotope abundance score (60), isotope spacing score (50), retention time score (50) |
|                                                                 | Do not match if overall score     | < 30                                                                                                  |
| Find by Ion – EIC Peak Integration and Filtering                | Integration                       | Agile 2                                                                                               |
|                                                                 | Peak height                       | $\geq 3000$ counts                                                                                    |
| Find by Ion – Post-Processing Filters                           | Absolute height                   | $\geq 1000$ counts                                                                                    |
|                                                                 | Score (Tgt)                       | $\geq 50$                                                                                             |
|                                                                 | Satisfy Find by Ion conditions in | $\geq 2$ files                                                                                        |
| Export to MPP                                                   | Exported value override           | Export median RT/mass instead of measured RT/mass                                                     |
|                                                                 |                                   | Export missing values as missing                                                                      |
|                                                                 | File Type                         | Profinder Archive                                                                                     |

**Table S4.** Source concentration estimate results for various method iterations, with results shown as the ratio of estimated vs. actual percent source concentration. Estimates were made with (a) SR520 sample dilution curve, (b) SR520 extract dilution curve, (c) SR518 extract dilution curve, or (d) targeted contaminants. The number of non-target HRMS compounds used to derive each estimate are shown in parentheses and italicized. Mixtures in which targeted contaminants were not detected are indicated by an asterisk.

| Dilution Curve Used: |                |                | (a) SR520 Sample Dilution                               |                                                         |                                                       | (b) SR520 Extract Dilution                              |                                                       | (c) SR518 Extract Dilution                              |                                                       | (d) Targeted Contaminants, from SR520 Sample Dilution Curve <sup>4</sup> |      |           |      |     |      |      |
|----------------------|----------------|----------------|---------------------------------------------------------|---------------------------------------------------------|-------------------------------------------------------|---------------------------------------------------------|-------------------------------------------------------|---------------------------------------------------------|-------------------------------------------------------|--------------------------------------------------------------------------|------|-----------|------|-----|------|------|
| Compound Group Used: |                |                | All Non-target Compounds <sup>1</sup>                   | All Non-target Compounds, Exclude outliers <sup>2</sup> | SR520 Unique Compounds, Exclude outliers <sup>3</sup> | All Non-target Compounds, Exclude outliers <sup>2</sup> | SR520 Unique Compounds, Exclude outliers <sup>3</sup> | All Non-target Compounds, Exclude outliers <sup>2</sup> | SR518 Unique Compounds, Exclude outliers <sup>3</sup> | DPG                                                                      | HMMM | Di-F HMMM | NCBA | HA  | DCMA | CPU  |
| Mix                  | Actual % SR520 | Actual % SR518 | Ratio of Estimated to Actual % SR520 (# compounds used) |                                                         |                                                       |                                                         |                                                       | Ratio of Estimated to Actual % SR-518 (# compounds)     |                                                       | Ratio of Estimated to Actual % SR520                                     |      |           |      |     |      |      |
| 1                    | 30             |                | 1.04 (429)                                              | 1.04 (401)                                              | --                                                    | 0.927 (447)                                             | --                                                    | --                                                      | --                                                    | 1.2                                                                      | 1.1  | 1.0       | 1.1  | 1.1 | 1.2  | 0.98 |
| 2                    | 18             |                | 1.11 (369)                                              | 1.11 (354)                                              | --                                                    | 0.989 (386)                                             | --                                                    | --                                                      | --                                                    | 1.3                                                                      | 1.1  | 1.2       | 1.2  | 1.2 | 1.1  | 1.1  |
| 3                    | 10             |                | 1.00 (241)                                              | 0.99 (225)                                              | --                                                    | 0.87 (278)                                              | --                                                    | --                                                      | --                                                    | 1.2                                                                      | 1.1  | 1.1       | 0.95 | 1.2 | 1.1  | 1.1  |
| 4A                   | 4              |                | 1.13 (177)                                              | 1.13 (166)                                              | --                                                    | 1.0 (185)                                               | --                                                    | --                                                      | --                                                    | 1.5                                                                      | 1.2  | 1.4       | 0.9  | 1.6 | 1.6  | 1.2  |
| 5A                   | 1              |                | 0.91 (28)                                               | 0.82 (23)                                               | --                                                    | 1.2 (32)                                                | --                                                    | --                                                      | --                                                    | *                                                                        | 0.57 | 0.78      | *    | 1.2 | 1.8  | 0.66 |
| 6A                   | 0.16           |                | 2.13 (15)                                               | 1.38 (12)                                               | --                                                    | 1.4 (14)                                                | --                                                    | --                                                      | --                                                    | *                                                                        | 0.38 | 0.69      | *    | *   | *    | *    |
| 4B                   | 4              | 10             | 1.65 (146)                                              | 1.43 (132)                                              | 1.05 (50)                                             | 1.5 (150)                                               | 1.1 (57)                                              | 3 (31)                                                  | 1.39 (5)                                              | 1.8                                                                      | 0.68 | 0.83      | 0.68 | 2.0 | 3.1  | 1.8  |
| 5B                   | 1              | 2.5            | 2.30 (54)                                               | 1.80 (44)                                               | 1.40 (13)                                             | 3.1 (70)                                                | 2.9 (25)                                              | 2.28 (11)                                               | 0.96 (1)                                              | *                                                                        | 0.50 | 0.62      | *    | 2.1 | 3.4  | 0.8  |
| 6B                   | 0.16           | 0.4            | 1.25 (13)                                               | 1.13 (12)                                               | 0.938 (5)                                             | 1.1 (10)                                                | 0.813 (3)                                             | 72 (8)                                                  | 0.925 (1)                                             | *                                                                        | *    | 0.56      | *    | *   | *    | *    |

<sup>1</sup>Estimate made with all non-target compounds that met screening criteria in source dilution curve and watershed mixture.

<sup>2</sup>See note 1, with outlier estimates excluded (outliers were >1.5 times the interquartile range above or below the third or first quartile, respectively).

<sup>3</sup>See notes 1 and 2, with compounds also detected in the secondary source excluded.

<sup>4</sup>Compounds are 1,3-diphenylguanidine (DPG), hexa(methoxymethyl)melamine (HMMM), Di-formylated (Di-F) HMMM, N-cyclohexylbenzothiazolamine (NCBA), hexylamine (HA), N,N-dicyclohexylmethylaniline (DCMA), and 1-cyclohexyl-3-phenylurea (CPU). Peak area data for source estimation were from the SR520 sample dilution curve.

**Table S5.** Results of SR520 source concentration estimates in single-source mixtures for various iterations of the source dilution curve range. These data compare estimates using only compounds within the peak area range of the modified dilution curve to estimates made using all qualified compounds, regardless of whether the mixture peak area fell within the peak area range of the dilution curve. The number of non-target compounds within, above, and below the dilution curve peak area range are also provided.

| SR520 Sample Dilution Curve (concentration points)     | Mixture   | Actual % SR520 | Number of Non-target Compounds             |       |       | Estimated % SR520, using compounds that are: |                                 |
|--------------------------------------------------------|-----------|----------------|--------------------------------------------|-------|-------|----------------------------------------------|---------------------------------|
|                                                        |           |                | Within Dilution Curve Peak Area (PA) Range | Above | Below | Within PA range                              | Within, above, & below PA range |
| <b>Full Range</b><br>(0.1, 1, 2.5, 6, 16, 40, 100)     | <b>1</b>  | 30             | 429                                        | 0     | 6     | 31.3                                         | 31.3                            |
|                                                        | <b>2</b>  | 18             | 369                                        | 1     | 54    | 20.0                                         | 19.4                            |
|                                                        | <b>3</b>  | 10             | 241                                        | 0     | 82    | 10                                           | 9.5                             |
|                                                        | <b>4A</b> | 4              | 177                                        | 1     | 55    | 4.5                                          | 4.5                             |
|                                                        | <b>5A</b> | 1              | 28                                         | 0     | 40    | 0.91                                         | 0.75                            |
|                                                        | <b>6A</b> | 0.16           | 15                                         | 0     | 29    | 0.3                                          | 0.3                             |
| <b>Remove top 1</b><br>(0.1, 1, 2.5, 6, 16, 40)        | <b>1</b>  | 30             | 286                                        | 25    | 0     | 27.7                                         | 28.2                            |
|                                                        | <b>2</b>  | 18             | 310                                        | 2     | 2     | 18.6                                         | 18.6                            |
|                                                        | <b>3</b>  | 10             | 274                                        | 0     | 10    | 9.5                                          | 9.4                             |
|                                                        | <b>4A</b> | 4              | 202                                        | 0     | 37    | 4.5                                          | 4.5                             |
|                                                        | <b>5A</b> | 1              | 34                                         | 1     | 41    | 0.85                                         | 0.78                            |
|                                                        | <b>6A</b> | 0.16           | 14                                         | 0     | 27    | 0.2                                          | 0.2                             |
| <b>Remove top 2</b><br>(0.1, 1, 2.5, 6, 16)            | <b>1</b>  | 30             | 16                                         | 227   | 2     | 9.5                                          | 27.9                            |
|                                                        | <b>2</b>  | 18             | 96                                         | 154   | 2     | 15.3                                         | 18.1                            |
|                                                        | <b>3</b>  | 10             | 230                                        | 4     | 3     | 9.1                                          | 9.1                             |
|                                                        | <b>4A</b> | 4              | 188                                        | 0     | 15    | 4.4                                          | 4.3                             |
|                                                        | <b>5A</b> | 1              | 34                                         | 1     | 43    | 0.9                                          | 0.76                            |
|                                                        | <b>6A</b> | 0.16           | 15                                         | 0     | 27    | 0.2                                          | 0.2                             |
| <b>Remove bottom 2</b><br>(1, 2.5, 6, 16, 40, 100)     | <b>1</b>  | 30             | 430                                        | 0     | 6     | 31.3                                         | 31.2                            |
|                                                        | <b>2</b>  | 18             | 368                                        | 1     | 55    | 20.0                                         | 19.4                            |
|                                                        | <b>3</b>  | 10             | 240                                        | 0     | 83    | 10                                           | 9.5                             |
|                                                        | <b>4A</b> | 4              | 177                                        | 1     | 55    | 4.5                                          | 4.5                             |
|                                                        | <b>5A</b> | 1              | 20                                         | 0     | 49    | 1.3                                          | 0.77                            |
|                                                        | <b>6A</b> | 0.16           | 6                                          | 0     | 38    | 3.2                                          | 0.4                             |
| <b>Remove bottom 1</b><br>(2.5, 6, 16, 40, 100)        | <b>1</b>  | 30             | 430                                        | 0     | 6     | 31.3                                         | 31.2                            |
|                                                        | <b>2</b>  | 18             | 368                                        | 1     | 55    | 19.9                                         | 19.3                            |
|                                                        | <b>3</b>  | 10             | 240                                        | 0     | 83    | 9.8                                          | 9.4                             |
|                                                        | <b>4A</b> | 4              | 171                                        | 1     | 61    | 4.4                                          | 4.3                             |
|                                                        | <b>5A</b> | 1              | 7                                          | 0     | 62    | 25.5                                         | 0.66                            |
|                                                        | <b>6A</b> | 0.16           | 3                                          | 0     | 41    | 7.7                                          | 0.4                             |
| <b>Remove 1 mid-point</b><br>(0.1, 1, 2.5, 6, 40, 100) | <b>1</b>  | 30             | 425                                        | 0     | 11    | 30.3                                         | 30.2                            |
|                                                        | <b>2</b>  | 18             | 351                                        | 1     | 72    | 19.2                                         | 18.4                            |
|                                                        | <b>3</b>  | 10             | 196                                        | 0     | 127   | 9                                            | 8.7                             |
|                                                        | <b>4A</b> | 4              | 159                                        | 1     | 73    | 4.1                                          | 4.1                             |
|                                                        | <b>5A</b> | 1              | 29                                         | 1     | 40    | 0.99                                         | 0.73                            |
|                                                        | <b>6A</b> | 0.16           | 15                                         | 0     | 29    | 0.31                                         | 0.3                             |

**Table S6.** Median peak area response observed for 12 isotopically labeled internal standards in the SR520 sample dilution curve.

| <b>% SR520 (Sample Dilution) / ISTD</b> | <b>100%</b> | <b>40%</b> | <b>16%</b> | <b>6%</b> | <b>2.50%</b> | <b>1%</b> | <b>0.10%</b> |
|-----------------------------------------|-------------|------------|------------|-----------|--------------|-----------|--------------|
| <b>Nicotine-d3</b>                      | 83%         | 85%        | 94%        | 88%       | 96%          | 97%       | 98%          |
| <b>Theobromine-d6</b>                   | 34%         | 30%        | 25%        | 18%       | 26%          | 24%       | 24%          |
| <b>Cotinine-d3</b>                      | 75%         | 83%        | 94%        | 89%       | 96%          | 97%       | 98%          |
| <b>Carbamazepine-d10</b>                | 82%         | 136%       | 144%       | 104%      | 108%         | 112%      | 115%         |
| <b>Sulfamethoxazole-d4</b>              | 53%         | 70%        | 85%        | 86%       | 94%          | 97%       | 98%          |
| <b>Sulfadimethoxine-d6</b>              | 21%         | 40%        | 58%        | 72%       | 79%          | 90%       | 97%          |
| <b>5-methyl-1H-benzotriazole-d6</b>     | 73%         | 83%        | 94%        | 95%       | 100%         | 102%      | 103%         |
| <b>Atrazine-d5</b>                      | 42%         | 75%        | 84%        | 86%       | 95%          | 94%       | 94%          |
| <b>DEET-d7</b>                          | 35%         | 51%        | 69%        | 83%       | 89%          | 92%       | 92%          |
| <b>Prometon-d3</b>                      | 36%         | 52%        | 74%        | 80%       | 91%          | 96%       | 99%          |
| <b>Metolachlor-d6</b>                   | 48%         | 79%        | 87%        | 85%       | 91%          | 93%       | 94%          |
| <b>Bis(2-ethylhexyl)phthalate-d4</b>    | 64%         | 81%        | 95%        | 80%       | 100%         | 104%      | 95%          |
| <b>Median ISTD Peak Area Response</b>   | 51%         | 77%        | 86%        | 85%       | 94%          | 97%       | 97%          |

**Table S7.** Quantitative estimates for SR520 roadway runoff concentration (as % v/v) using source-specific chemical surrogates identified within the non-target data set. The identified surrogates met the SR520 sample dilution curve screening criteria, were detected in all single-source watershed mixtures, and were absent in the SR518 runoff.

| <b>Mass @ RT</b>   | <b>Identity</b>                                  | <b>Estimated % SR520 (via sample dilution curve)</b> |       |       |        |        |        |
|--------------------|--------------------------------------------------|------------------------------------------------------|-------|-------|--------|--------|--------|
|                    |                                                  | Mix 1                                                | Mix 2 | Mix 3 | Mix 4A | Mix 5A | Mix 6A |
| 282.1453@6.77 min  | HMMM in-source fragment                          | 32                                                   | 25    | 12    | 5.4    | 1.14   | 0.18   |
| 282.1732@8.55 min  | C <sub>18</sub> H <sub>22</sub> N <sub>2</sub> O | 25                                                   | 15    | 11    | 7.4    | 1.02   | 0.09   |
| 420.2349@7.21 min  | Di-formylated HMMM                               | 30                                                   | 21    | 11    | 5.6    | 0.78   | 0.11   |
| 772.5488@13.58 min | Tridecapropylene glycol                          | 33                                                   | 17    | 7     | 3.0    | 0.49   | 0.35   |
| 888.6326@14.54 min | Pentadecapropylene glycol                        | 41                                                   | 26    | 10    | 5.7    | 0.68   | 0.78   |
|                    | <b>Actual Source Concentration:</b>              | 30                                                   | 18    | 10    | 4      | 1      | 0.16   |



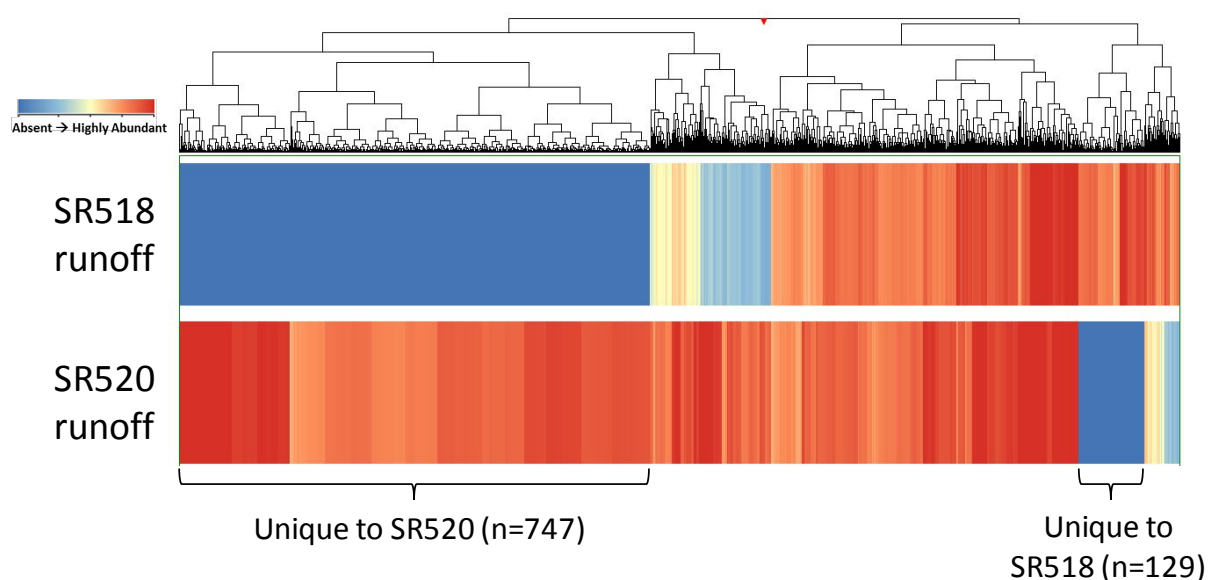

**Figure S1.** Hierarchical cluster diagram of SR518 and SR520 road runoff, where each vertical line represents an individual non-target compound and the color scheme represents peak area (abundance), increasing from absent = dark blue to light blue, yellow, peach, and red = maximum detected peak area. The features unique to each source are noted. Although only one sample of each roadway runoff was used in this study (representing 1 storm for SR518 or a composite of 2 storms for SR520), we note that based on our experience with sampling both SR520 and SR518 repeatedly for separate studies, the roadway runoff composition is surprisingly consistent across different seasons and storm event sizes.

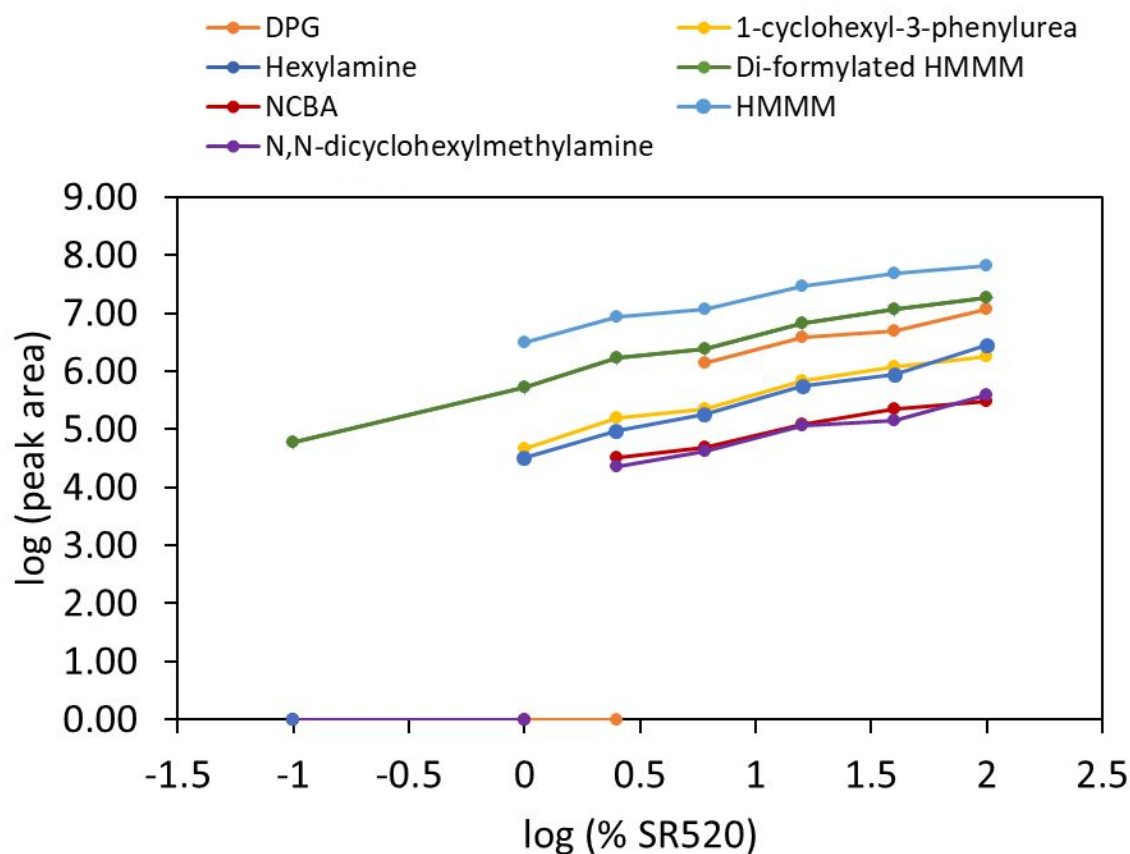

**Figure S2.** Log-scale SR520 sample dilution curves (peak area vs. SR520 concentration) for identified road runoff compounds, including diphenylguanidine (DPG), dicyclohexylmethylamine, N-cyclohexyl-benzothiazolamine (NCBA), hexa(methoxymethyl)melamine (HMMM), di-formylated HMMM, 1-cyclohexyl-3-phenylurea, and hexylamine.
